# Supplementary material for: The susceptibility of Aedes aegypti populations displaying temephos resistance to Bacillus thuringiensis israelensis: a basis for management
Source: PubMed Central journal article supplement (PMC3852962; doi:10.1186/1756-3305-6-297), 2013-10-13
Supplement: 1756-3305-6-297-S1.pdf [file 1756-3305-6-297-S1.pdf]

**Additional File 1 Activity of detoxifying enzymes in *Aedes aegypti* adults from sampled populations compared to the Rockefeller colony**

| Sample                  | Glutathione S-transferase (GST)<br>(mmol/mg ptn/min) |                  |                        |                | $\alpha$ -esterase<br>(nmol/mg ptn/min) |        |           |    | $\beta$ -esterase<br>(nmol/mg ptn/min) |        |           |   | Esterases-PNPA<br>( $\Delta$ abs/mg ptn/min) |       |           |    | Mixed function oxidases<br>(nmol/mg ptn/min) |        |           |    |
|-------------------------|------------------------------------------------------|------------------|------------------------|----------------|-----------------------------------------|--------|-----------|----|----------------------------------------|--------|-----------|---|----------------------------------------------|-------|-----------|----|----------------------------------------------|--------|-----------|----|
|                         | N <sup>a</sup>                                       | p99 <sup>b</sup> | %<br>>p99 <sup>c</sup> | S <sup>d</sup> | N                                       | p99    | %<br>>p99 | S  | N                                      | p99    | %<br>>p99 | S | N                                            | p99   | %<br>>p99 | S  | N                                            | p99    | %<br>>p99 | S  |
|                         | Rockefeller                                          | 114              | 1.97                   | -              | -                                       | 104    | 65.87     | -  | -                                      | 112    | 98.83     | - | -                                            | 119   | 5.33      | -  | -                                            | 113    | 47.35     | -  |
| RecL                    | 69                                                   | 2.58             | 4                      | U              | 74                                      | 75.63  | 11        | U  | 120                                    | 108.41 | 3         | U | 120                                          | 5.55  | 2         | U  | 103                                          | 59.06  | 8         | U  |
| RecR (F20) <sup>e</sup> | 115                                                  | 3.49             | 26                     | A              | 116                                     | 116.81 | 47        | A  | 113                                    | 114.94 | 4         | U | 100                                          | 6.36  | 6         | U  | 117                                          | 63.27  | 34        | A  |
| Rockefeller             | 123                                                  | 1.41             | -                      | -              | 120                                     | 49.30  | -         | -  | 113                                    | 73.58  | -         | - | 116                                          | 3.69  | -         | -  | 119                                          | 66.12  | -         | -  |
| F. Noronha              | 115                                                  | 2.97             | 69                     | HA             | 83                                      | 96.34  | 17        | A  | 99                                     | 166.33 | 12        | U | 108                                          | 6.54  | 71        | HA | 118                                          | 70.52  | 3         | U  |
| Bacabal                 | 110                                                  | 2.59             | 73                     | HA             | 110                                     | 56.91  | 20        | A  | 90                                     | 76.30  | 2         | U | 111                                          | 6.89  | 27        | A  | 116                                          | 97.63  | 28        | A  |
| Recife                  | 151                                                  | 2.58             | 33                     | A              | 192                                     | 56.52  | 9         | U  | 186                                    | 70.54  | 1         | U | 151                                          | 5.14  | 13        | U  | 189                                          | 73.05  | 4         | U  |
| Macapá                  | 117                                                  | 2.60             | 38                     | A              | 119                                     | 77.84  | 62        | HA | 116                                    | 138.52 | 42        | A | 108                                          | 8.12  | 69        | HA | 101                                          | 75.47  | 7         | U  |
| J. Pessoa               | 115                                                  | 3.29             | 76                     | HA             | 114                                     | 72.35  | 33        | A  | 111                                    | 68.04  | 1         | U | 112                                          | 8.02  | 71        | HA | 74                                           | 61.79  | 0         | U  |
| Salgueiro               | 115                                                  | 2.53             | 83                     | HA             | 115                                     | 67.97  | 11        | U  | 112                                    | 71.08  | 2         | U | 114                                          | 8.81  | 82        | HA | 106                                          | 118.09 | 38        | A  |
| Agrestina               | 76                                                   | 3.68             | 61                     | HA             | 145                                     | 63.35  | 25        | A  | 151                                    | 73.93  | 1         | U | 94                                           | 7.20  | 37        | A  | 138                                          | 85.48  | 20        | A  |
| G. Goitá                | 112                                                  | 3.66             | 42                     | A              | 99                                      | 64.59  | 19        | A  | 103                                    | 95.30  | 4         | U | 113                                          | 5.57  | 31        | A  | 77                                           | 73.63  | 9         | U  |
| A. Ingazeira            | 150                                                  | 2.65             | 55                     | HA             | 117                                     | 105.53 | 68        | HA | 118                                    | 94.67  | 27        | A | 154                                          | 7.34  | 62        | HA | 152                                          | 78.66  | 5         | U  |
| Oiapoque                | 97                                                   | 2.93             | 42                     | A              | 111                                     | 77.20  | 58        | HA | 111                                    | 119.97 | 14        | U | 107                                          | 11.31 | 79        | HA | 114                                          | 79.65  | 8         | U  |
| Cedro                   | 114                                                  | 5.07             | 87                     | HA             | 116                                     | 80.44  | 41        | A  | 116                                    | 91.99  | 6         | U | 114                                          | 7.43  | 48        | A  | 117                                          | 111.01 | 54        | HA |
| S.J. Egito              | 118                                                  | 2.79             | 75                     | HA             | 110                                     | 62.10  | 11        | U  | 116                                    | 82.60  | 3         | U | 105                                          | 5.26  | 21        | A  | 107                                          | 199.73 | 22        | A  |
| S.C. Capibaribe         | 115                                                  | 2.81             | 86                     | HA             | 118                                     | 69.56  | 31        | A  | 111                                    | 76.71  | 3         | U | 114                                          | 9.12  | 87        | HA | 116                                          | 71.79  | 6         | U  |
| Araripina               | 80                                                   | 2.22             | 29                     | A              | 115                                     | 100.17 | 59        | HA | 116                                    | 93.38  | 14        | U | 39                                           | 5.43  | 31        | A  | 72                                           | 44.59  | 0         | U  |

<sup>a</sup> Number of tested individuals.

<sup>b</sup> 99<sup>th</sup> Percentile for the populations.

<sup>c</sup> Percentual of individuals that display an activity higher than the 99<sup>th</sup> Percentile of the Rockefeller reference.

<sup>d</sup> Classification of enzyme activity (Brasil, 2006) compared to control (Rockefeller): unaltered (U); altered (A) and highly altered (HA).

<sup>e</sup> Data on this line are the reference for the samples below.
